# Supplementary material
Source: ML conference proceedings conference paper supplement (https://openreview.net/forum?id=K3xNKR3yOf)
Supplement: supplementary_material [file attachment]

---

# Supplementary

## *Too Many Frames, Not All Useful:*

## Efficient Strategies for Long-Form Video QA

---

Jongwoo Park<sup>1</sup> Kanchana Ranasinghe<sup>1</sup> Kumara Kahatapitiya<sup>1</sup>  
Wonjeong Ryoo Donghyun Kim<sup>2</sup> Michael S. Ryoo<sup>1</sup>

<sup>1</sup>Stony Brook University <sup>2</sup>Korea University  
jongwopark@cs.stonybrook.edu  
<https://github.com/jongwoopark7978/LVNet>

## Appendix

### A.1 Additional Ablations

In this section, we present additional experiments conducted to inform the LVNet’s design. We have tested different LLMs and experimented with various scales of the visual feature map.

Table A.1: **Ablations on EgoSchema [2]:** We evaluate different design decisions of our framework on EgoSchema 500-video subset for zero-shot VQA.

| (a) <b>Choice of LLM:</b> We consider different options for our LLM for video QA. |          | (b) <b>Effect of Patch Size on Keyword Matching in CKD:</b> We consider different patch sizes to measure the similarity between the image and the keyword. |          |
|-----------------------------------------------------------------------------------|----------|------------------------------------------------------------------------------------------------------------------------------------------------------------|----------|
| LLM                                                                               | Acc. (%) | Patch Size                                                                                                                                                 | Acc. (%) |
| GPT-3.5                                                                           | 61.0     | 1x1                                                                                                                                                        | 63.6     |
| GPT-4                                                                             | 65.4     | 7x7                                                                                                                                                        | 66.2     |
| GPT-4o                                                                            | 68.2     | 14x14                                                                                                                                                      | 68.2     |

**Choice of LLM:** Our results show that GPT-4o outperforms both GPT-4 and GPT-3.5 by 2.8% and 7.2%, respectively. Given that GPT-4o is more cost-effective and lightweight compared to GPT-4, we have selected it as our default LLM.

**Effect of Patch Size on Keyword Matching in CKD:** Since keywords can represent activities spanning the entire image or confined to a small region, we adjust the resolution of the visual feature map output from the spatially aware contrastive image pre-training (CLIP) network [3] to match keywords. Our findings show that higher resolutions lead to better accuracy. In LVNet, we use a  $14 \times 14$  feature map and determine the confidence level of the keyword by selecting the maximum value between the  $14 \times 14$  patches and the keyword’s text embedding.

## A.2 Algorithms in Detail

Our algorithms are presented in full detail in Algorithm 1, Algorithm 2, and Algorithm 3. TSC in Algorithm 1 extracts per-frame visual features using ResNet-18, followed by an iterative clustering procedure to identify  $n$  non-overlapping frame sets. Within each of the  $n$  sets, we uniformly sample  $\leq \tau$  frames, obtaining a total of  $T_a \leq \tau \times n$  frames. For example, LVNet sets  $\psi = 5, \lambda = 12, \tau = 18$ , resulting in approximately  $n \sim 25$  and  $T_a \sim 390$  on the EgoSchema dataset. CKD in Algorithm 2 selects top  $L$  frames based on similarity/confidence scores, which are calculated using cosine similarity between frames and keywords with CLIP-B/16. LVNet employs  $L = 32, \text{len}(K) \leq 25$  on the EgoSchema dataset. FKD in Algorithm 3 sorts frames and their corresponding keywords by confidence scores, and reorder the  $K$  frames with the lowest scores temporally. It groups frames sequentially into visual templates, each consisting of  $N$  frames. From each template, the  $M$  frames and keywords most relevant among the  $N$  pairs are selected using GPT-4o. We set  $L = 32, K = 16, N = 8, M = 3$ .

---

### Algorithm 1: Temporal Scene Clustering

---

```

1: Require: ResNet-18 [1] pretrained on imagenet dataset  $f$ , frame list  $\mathbf{List}_{frame}$ , image index
   list  $\mathbf{List}_{index} \in \{1, \dots, N\}$ , minimum number of list length  $\psi$ , temperature  $\lambda$ , number of
   sample  $\tau$ , function to find index of  $x$  in list  $\mathbf{w}$   $\text{index}(x, \mathbf{w})$ , and function to sort list  $\text{sort}(\mathbf{List})$ 

2: for all  $\text{img}^i$  in  $\mathbf{List}_{frame}$  do
3:    $\mathbf{F}^i \leftarrow f(\text{img}^i)$ 
4:    $\mathbf{List}_{feat}.\text{insert}(\mathbf{F}^i)$ 
5: end for
6: for all  $\mathbf{F}^i$  in  $\mathbf{List}_{feat}$  do
7:    $\mathbf{List}_{dist} \leftarrow \sum_y \sum_x \sqrt{\frac{(\mathbf{F}^i - \mathbf{List}_{feat})^2}{x \times y}}$ 
8:    $\mathbf{M}_{dist}.\text{insert}(\mathbf{List}_{dist})$ 
9: end for
10: while length of  $\mathbf{List}_{index} > \psi$  do
11:    $\mathbf{List}_{sample} \leftarrow \emptyset$ 
12:    $\mathbf{List}_{\delta} \leftarrow \emptyset$ 
13:    $i \leftarrow \mathbf{List}_{index}.\text{pop}(0)$ 
14:    $\mathbf{p}^i \leftarrow \text{softmax}(\mathbf{M}_{dist}^i)$ 
15:    $\mu_{\mathbf{p}^i}, \sigma_{\mathbf{p}^i} \leftarrow \text{mean}(\mathbf{p}^i), \text{std}(\mathbf{p}^i)$ 
16:    $\beta \leftarrow \mu_{\mathbf{p}^i} - \sigma_{\mathbf{p}^i} \sum_{i=0} e^{1-i/\lambda}$ 
17:   for all prob in  $\mathbf{p}^i$  do
18:     if prob  $< \beta$  then
19:        $\mathbf{List}_{selected}.\text{insert}(\text{index}(\text{prob}, \mathbf{p}^i))$ 
20:     end if
21:   end for
22:   for all  $\gamma$  in  $\mathbf{List}_{selected}$  do
23:      $\delta \leftarrow \gamma \text{th value in } \mathbf{List}_{index}$ 
24:      $\mathbf{List}_{\delta}.\text{insert}(\delta)$ 
25:      $\mathbf{List}_{index}.\text{pop}(\gamma)$ 
26:   end for
27:    $\mathbf{List}_{\delta}.\text{insert}(i)$ 
28:    $\mathbf{List}_{sample} \leftarrow \text{sample } \tau \text{ items from } \mathbf{List}_{\delta}$ 
29:    $\text{sort}(\mathbf{List}_{sample})$ 
30:   for all  $\text{frame}^j$  in  $\mathbf{List}_{frame}$  do
31:     if  $j$  in  $\mathbf{List}_{sample}$  then
32:        $\text{Outputs}.\text{insert}(\text{frame}^j)$ 
33:     end if
34:   end for
35: end while

```

---

---

**Algorithm 2:** Keyword-Image Matching Process in CKD

---

```
1: Require: keyword set  $\mathbf{K}$ , image set  $\mathbf{I}$ , total length of selected image set  $L$ , function to calculate  
   similarity matrix  $\mathbf{sim}(\mathbf{K}, \mathbf{I})$ , function to sort similarity matrix and return indices  $\mathbf{sort}(\mathbf{S})$   
2:  $\mathbf{S} \leftarrow \mathbf{sim}(\mathbf{K}, \mathbf{I})$   
3:  $\mathbf{S}_{sorted}, \mathbf{idx}_{sorted} \leftarrow \mathbf{sort}(\mathbf{S})$   
4: Initialize  $\mathbf{P}_{best}$  as an empty list  
5: Initialize  $\mathbf{I}_{selected}$  as an empty set  
6: while length of  $\mathbf{I}_{selected} < L$  do  
7:   for  $k \in \mathbf{K}$  do  
8:     for  $i \in \mathbf{I}$  do  
9:        $i_{index} \leftarrow \mathbf{idx}_{sorted}[k][i]$   
10:      if  $i_{index}$  not in  $\mathbf{I}_{selected}$  then  
11:         $\mathbf{P}_{best}.\text{insert}(k, i_{index})$   
12:         $\mathbf{I}_{selected}.\text{insert}(i_{index})$   
13:        break  
14:      end if  
15:    end for  
16:    if length of  $\mathbf{I}_{selected} \geq L$  then  
17:      break  
18:    end if  
19:  end for  
20: end while  
21: return  $\mathbf{P}_{best}$ 
```

---

---

**Algorithm 3:** Fine Keyframe Detection Process (FKD)

---

```
1: Require: keyword set  $\mathbf{K}$ , image set  $\mathbf{I}$ , similarity score list  $\mathbf{S}$ , total length  $L$ , number of low  
   similarity indices  $K$ , number of frames per visual template  $N$ , number of keyframes selected per  
   visual template  $M$ , function to sort by similarity  $\mathbf{sort}(\mathbf{S})$ , function to order indices temporally  
    $\mathbf{temporal\_order}()$   
2:  $\mathbf{idx}_{sorted} \leftarrow \mathbf{sort}(\mathbf{S})$   
3:  $\mathbf{idx}_{low\_sim} \leftarrow \mathbf{idx}_{sorted}[-K : ]$   
4:  $\mathbf{idx}_{temporal} \leftarrow \mathbf{temporal\_order}(\mathbf{idx}_{low\_sim})$   
5:  $\mathbf{idx}_{final} \leftarrow \text{concatenate}(\mathbf{idx}_{sorted}[: -K], \mathbf{idx}_{temporal})$   
6:  $\mathbf{I}_{ordered}, \mathbf{K}_{ordered} \leftarrow \mathbf{I}[\mathbf{idx}_{final}], \mathbf{K}[\mathbf{idx}_{final}]$   
7:  $\mathbf{sets} \leftarrow \text{create\_sets}(\mathbf{I}_{ordered}, \mathbf{K}_{ordered}, L//N)$   
8: for each set  $\in \mathbf{sets}$  do  
9:    $\mathbf{I}_{selected} \leftarrow \text{select\_top\_M}(\text{set}, M)$   
10: end for  
11: return  $\mathbf{I}_{selected}$ 
```

---

### A.3 Prompting: Fine Keyframe Detector

We prompt the VLM to select frames that are most compatible with the list of given keywords. Each template image contains 8 images, and their order is described in language (e.g. top left to right, bottom left to right) and the VLM outputs the selected images according to our prompting as described in Figure A.1.

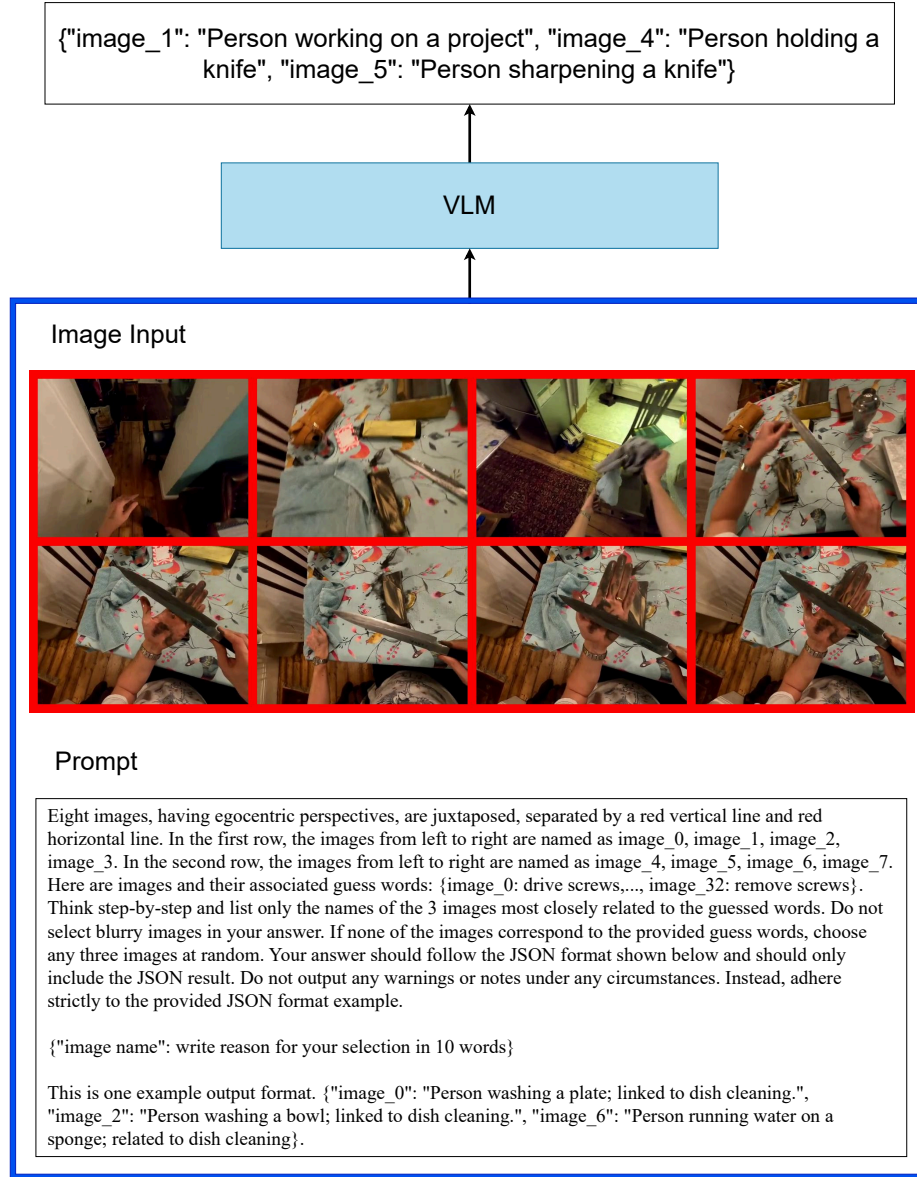

Figure A.1: **Prompt for Fine Keyframe Detection:** The figure illustrates the input image, the prompt provided to the VLM, and the output. The input image represents a visual template composed of eight frames, and the prompt requests the three best frames along with their corresponding keywords. The output displays the top three selected frames and their associated keywords.

## References

- [1] Kaiming He, Xiangyu Zhang, Shaoqing Ren, and Jian Sun. Deep residual learning for image recognition. In *Proceedings of the IEEE conference on computer vision and pattern recognition*, pages 770–778, 2016.
- [2] Karttikeya Mangalam, Raiymbek Akshulakov, and Jitendra Malik. Egoschema: A diagnostic benchmark for very long-form video language understanding. *ArXiv*, abs/2308.09126, 2023.
- [3] Kanchana Ranasinghe, Brandon McKinzie, Sachin Ravi, Yinfei Yang, Alexander Toshev, and Jonathon Shlens. Perceptual grouping in contrastive vision-language models. In *ICCV*, 2023.
